1  
2  
3  
4  
5  
6  
7  
8  
9  
10  
11  
12  
13  
14  
15  
16

Refutation of traumatic insemination in the *Drosophila bipectinata* species  
complex: Hypothesis fails critical tests

Michal Polak<sup>1\*</sup> & Shane F. McEvey<sup>2</sup>

<sup>1</sup>Department of Biological Sciences, University of Cincinnati, Cincinnati, OH 45221-0006

United States of America

ORCID ID: [0000-0002-5061-1534](https://orcid.org/0000-0002-5061-1534)

<sup>2</sup>Australian Museum Research Institute, Australian Museum, 1 William Street, Sydney NSW

2010, Australia

ORCID ID: [0000-0002-7747-789X](https://orcid.org/0000-0002-7747-789X)

\*Correspondence: [polakm@ucmail.uc.edu](mailto:polakm@ucmail.uc.edu)

Twitter: [@cincidros](https://twitter.com/cincidros)

17 **Abstract**

18 Traumatic insemination (TI) is a rare reproductive behaviour characterized by the transfer of sperm  
19 to the female via puncture wounds inflicted across her body wall. Here, we challenge the claim made  
20 by Kamimura (2007) that males of species of the *Drosophila bipectinata* complex utilize a pair of  
21 claw-like processes (“claws”) to traumatically inseminate females: the claws are purported to  
22 puncture the female body wall and genital tract, and to inject sperm through the wounds into the  
23 genital tract, bypassing the vaginal opening, the route of sperm transfer occurring in other  
24 *Drosophila*. This supposed case of TI is widely cited and featured in prominent subject reviews. We  
25 examined high-resolution scanning electron micrographs of the claws and failed to discover any  
26 obvious “groove” for sperm transport. We demonstrated that sperm occurred in the female  
27 reproductive tract as a single integrated unit when mating flies were experimentally separated,  
28 inconsistent with the claim that sperm are injected via paired processes. The aedeagus in the  
29 *bipectinata* complex was imaged, and shown to deliver sperm through the vaginal opening. Laser  
30 ablation of the sharp terminal ends of the claws failed to inhibit insemination. The results refute the  
31 claim of TI in the *Drosophila bipectinata* species complex.

32

33 **Key words:** *Drosophila bipectinata* species complex; traumatic insemination hypothesis; copulation;  
34 aedeagal lateral processes; genital claws; anchoring; sperm delivery

## 35 1. Introduction

36 Traumatic insemination (TI) is a form of mating behaviour during which males employ  
37 specialized “devices”, such as spines and stylets, to puncture the female body wall and transfer sperm  
38 through the wound(s) (Lange et al., 2013). This extraordinary behaviour is distinguished from other  
39 forms of “traumatic mating”, where only non-sperm components of the ejaculate, or no ejaculate at  
40 all, transfer to the female through male-inflicted wounds (Blanckenhorn et al., 2002; Siva-Jothy,  
41 2009; Lange et al., 2013; Reinhardt et al., 2015).

42 Though rare, TI *sensu stricto* has arisen independently in a number of animal groups  
43 (Reinhardt et al., 2015), and the evolutionary drivers of this unusual form of insemination are of  
44 considerable interest and the focus of ongoing debate (Eberhard 1985, 1996; Arnqvist and Rowe,  
45 2005; Tataric and Cassis, 2010; Lange et al., 2013; Tataric et al., 2014; Dougherty et al., 2017;  
46 Brand et al., 2021). The identification of *bona fide* cases of TI in animals will be important not only  
47 for accurately documenting the taxonomic distribution of this remarkable form of mating (Reinhardt  
48 et al., 2015), but also for facilitating the comparative method to test hypotheses about the selective  
49 pressures favoring its emergence in evolution (Futuyma and Kirkpatrick, 2017, p. 69). Distinguishing  
50 the various forms of traumatic mating also lies at the heart of our ability to predict specific selective  
51 challenges females may face during mating, and hence to interpret immunological, anatomical, and  
52 behavioural features as potential counter-adaptations to variable forms of male-induced harm in the  
53 broader context of sexual conflict theory (Johnstone and Keller, 2000; Hosken et al., 2003; Morrow  
54 et al., 2003; Arnqvist and Rowe, 2005; Rönn et al., 2007; Siva-Jothy, 2009; Dougherty et al., 2017).

55 Among terrestrial arthropods, TI is particularly prevalent in the hemipteran infraorder  
56 Cimicomorpha, which includes the well-studied human bed bug, *Cimex lectularius*. Males of this  
57 species pierce the ventral surface of a female’s abdomen with a curved, needle-like, hollow stylet (or  
58 paramere) (Usinger, 1966) that possesses a sizeable pore near its tip (Fig. 1), through which sperm  
59 and seminal fluid are injected into the female (Davis, 1956; Carayon, 1966). Cases of TI have also  
60 been convincingly demonstrated in the plant bug genus *Coridromius* (Tataric & Cassis, 2010), the

61 spider *Harpactea sadistica* (Řezáč, 2009), and the marine flatworm *Pseudocerus bifurcus* (Michiels  
62 and Newman, 1998; and see Brand et al., 2021).

63 It has been claimed by Kamimura (2007) (henceforth K2007) that TI occurs in species of the  
64 *Drosophila bipectinata* complex, a small taxonomic grouping of four very similar species in the  
65 *ananassae* subgroup of the *melanogaster* species group, that includes: *D. bipectinata* Duda, 1923; *D.*  
66 *parabipectinata* Bock, 1971; *D. malerkotliana* Parshad and Paika, 1965; and *D. pseudoananassae*  
67 Bock, 1971 (Bock, 1971). Specifically, males of these species are purported to use a pair of claw-like  
68 phallic structures, called “basal processes” by K2007, but which we call aedeagal lateral processes  
69 following Rice et al. (2021), as explained below, to pierce the female body wall and reproductive  
70 tract, and inject sperm into her reproductive tract through the wound sites. If true, then TI in this  
71 complex would be an astonishing evolutionary innovation within the genus, family and order.

72 A wide range of species of *Drosophila* and related genera have been used to investigate  
73 dipteran reproductive biology in detail. This body of knowledge both underscores the astounding  
74 nature of the TI claim and provides a thorough understanding of the “typical” route of sperm transfer,  
75 storage and use, which is particularly well understood for the model organism, *D. melanogaster*. In  
76 this species, mating lasts approximately 20 min during which the male and female attach through the  
77 union and integration of various male and female genital structures (Eberhard and Ramirez, 2004;  
78 Jagadeeshan and Singh, 2006; Mattei et al., 2015). The intromittent organ in males is the aedeagus,  
79 and the ejaculate, comprised of sperm and seminal plasma, pass via the tip of the aedeagus into the  
80 female uterus (bursa) via her gonopore (Bairati, 1968; Fowler, 1973; Manier et al., 2010; Mattei et  
81 al., 2015). The transferred ejaculate fills and can considerably swell the bursa in this and other  
82 species (Patterson, 1946; Lefevre and Jonsson, 1962; Markow and Ankney, 1988; Alonso-Pimentel  
83 et al., 1994). Upon dissection of the female after the termination of copulation, the ejaculate can  
84 readily be visualized intact by teasing the bursa open and releasing the sperm mass associated with  
85 its “waxy” plug material (Alonso-Pimentel et al., 1994; Pitnick and Markow, 1994; Polak et al.,  
86 1998). As sperm entry into storage within the female requires some time to begin (approximately 4



87 minutes in *D. melanogaster*) after the end of copulation (Manier et al., 2010), the dissected sperm  
88 mass may be discerned intact with its full complement of sperm, so long as it is dissected from the  
89 bursa quickly after copulation (Pitnick and Markow, 1994; Manier et al., 2010; Polak and Rashed,  
90 2010; Tyler et al., 2021).

91 In K2007's study, adult males were allowed to ingest food containing rhodamine-B  
92 fluorescent dye, and were mated to virgin females. Mating pairs were flash frozen in liquid nitrogen  
93 5 minutes after the onset of copulation (uninterrupted copulations last, on average, approximately  
94 10.6 min in *D. bipectinata*, Polak et al., 2021, and see below), and abdomens of coupled pairs  
95 removed, mounted and observed. A laser scan micrograph showing two areas of coloration adjacent  
96 to the tips of the basal processes (figure 1 (c) (ii) in K2007) was evidence put forward for the  
97 occurrence of TI. On the basis of these images, Kamimura claimed that the two claw-like processes  
98 pierce the female's body wall, and transfer sperm through the wounds into the female reproductive  
99 tract, bypassing the opening of the vagina (gonopore). The following is the relevant excerpt from  
100 K2007 (pp. 403–404): "TI clearly occurs in the *bipectinata* complex, as the basal processes pierce the  
101 pockets during copulation and sperm is ejaculated through the wounds but not through the genital  
102 orifice...". No direct evidence for the passage of sperm via such a route was provided. The following  
103 statement likewise gave us pause (p. 404): "The basal processes of this group have a groove on the  
104 dorsal surface which may transport semen." The problem also here is that no visual evidence for such  
105 a groove was presented.

106 Another source of our skepticism regarding K2007's claim comes from our own observations  
107 of the ejaculated sperm mass in *D. bipectinata* made previously (Polak and Rashed, 2010; Tyler et  
108 al., 2021). Upon dissection from the female bursa immediately after copulation, the sperm in *D.*  
109 *bipectinata*, which are 1.63 mm long (Tyler et al., 2021) and, for reference, slightly shorter (by c.  
110 12%) than in *D. melanogaster* (1.85 mm, (Manier et al., 2013)), invariably occur as a *single and*  
111 *strongly integrated mass* in association with characteristic "waxy" plug material, similar in  
112 appearance to that seen in *D. melanogaster*. This observation challenges the TI hypothesis of

113 insemination via paired “basal processes”, because if TI occurs we would expect the injected sperm  
114 mass within the bursa immediately after copulation to be discernable as two more-or-less distinct  
115 units, but we have consistently observed only a single, highly integrated mass (Tyler et al., 2021).  
116 The sperm tails in *D. bipectinata* are long and the sperm mass consequently is difficult to disentangle  
117 (Tyler et al., 2021), so the idea that two separate masses injected via the paired “basal processes”  
118 would then dynamically coalesce during mating, or shortly thereafter, and form a single  
119 homogeneous mass with associated plug material, seems unlikely.

120         Here, we challenge the claim that TI occurs in the *bipectinata* complex. Our results provide  
121 observational and direct experimental evidence contradicting such a claim: the evidence supports  
122 sperm transfer occurring via the route of sperm delivery in other *Drosophila*, that is, through the  
123 female gonopore into the reproductive tract. In the present section we first offer a reinterpretation of  
124 the male phallic architecture of species within the *bipectinata* complex, following the standardized  
125 nomenclature proposed for *D. melanogaster* (Rice et al., 2019) and refined for a wider group of  
126 species following developmental studies (Rice et al., 2021). On the one hand, we agree with K2007  
127 that the paired claw-like structures, the purported piercing organs of TI, are not a “bifid aedeagus”, a  
128 terminology adopted by earlier authors. Okada ((Okada, 1954), pl. 3, fig. 14) illustrated the *D.*  
129 *bipectinata* male terminalia and labelled the paired structures “aedeagus”, and Parshad and Paika  
130 used the term “bifid” in describing the same paired structures (Parshad and Paika, 1964). Bock  
131 (1971) used the descriptor “aedeagus bifid and bare” to distinguish the *bipectinata* complex, and  
132 Bock and Wheeler (1972) and Gupta (1973) followed this usage. On the other hand, we also agree  
133 with Rice et al. ’s (2021) suggestion that the claw-like structures should be termed “aedeagal lateral  
134 processes”, rather than K2007’s “basal processes”. Rice et al. (2021) showed that the claws have a  
135 distinct developmental origin, deriving from the *lateral* portions of the central primordium of the  
136 phallus observable during metamorphosis in the pupa. Since most of the cells of the central  
137 primordium normally give rise, in related *Drosophila* subgroups, to the aedeagus (not to postgonites,

138 pregonites, or postgonal sheath) the term *aedeagal lateral process* was proposed by Rice et al.  
139 (2021), a term we adopt here.

140 As a first step in our test of the TI hypothesis, we examined scanning electron micrographs of  
141 the aedeagal lateral processes (claws) at varying orientations and magnifications to search for the so-  
142 called “groove”—the alleged conduit for sperm delivery. We then addressed two additional  
143 predictions. The first is that the sperm mass should be observable as two more-or-less distinct units  
144 upon transfer to the female, as mentioned above. To this end, we dissected and examined the  
145 ejaculated sperm masses extracted from the female reproductive tract both immediately after the  
146 terminus of full-length, uninterrupted copulations, and after pairs were interrupted 6–8 min after the  
147 onset of coupling. Reproductive structures of both sexes were also examined after copulation  
148 interruption to elucidate the path of sperm transfer to the female. Finally, we used ultraprecise laser  
149 surgery (Polak and Rashed, 2010) to ablate the terminal ends of both claws in individual males, thus  
150 eliminating their pointed tips. If the claws serve to transfer sperm by piercing across the female’s  
151 body wall and reproductive tract, then males with surgically ablated piercing devices should fail to  
152 transfer sperm.

153

## 154 **2. Material and methods**

### 155 **(a) Source and culture of flies**

156 *Drosophila bipectinata* Duda and *D. parabipectinata* Bock cultures were established with field-  
157 caught flies captured from the surface of fallen fruits in Taiwan (25°2'30.24" N, 121°36'39.37" E). A  
158 *D. malerkotliana* Parshad and Paika culture was established with flies from Thailand (8°54'22.24"N  
159 98°31'43.51"E). Flies were cultured in half-pint glass bottles on standard cornmeal-agar medium  
160 within an environmental chamber under controlled light and temperature conditions (12h light  
161 (24°C):12h dark (22°C)). Adult virgin flies for mating trials were harvested under a light stream of  
162 humidified CO<sub>2</sub> within 8 h of emergence, and housed in groups of 10–15 flies in 8-dram food vials  
163 containing cornmeal-agar medium. All flies used in mating trials were 4–6 d old. Material for

164 morphological examination and imaging of genitalia were also derived from ethanol-preserved  
165 specimens held in the Australian Museum, Sydney (AMS K.380306–07).

166

### 167 **(b) Laser surgery**

168 The laser surgical protocol is described in detail elsewhere (Polak and Rashed, 2010). Briefly, young  
169 males (< 24 h of age) were anesthetized with CO<sub>2</sub> in an acrylic chamber with a thin glass bottom.

170 The male was positioned ventral side down in the chamber, so the external genitalia were visible  
171 from below and accessible to the laser light. The chamber was mounted on a Prior (Rockland, MA,

172 USA) H117 motorized stage fitted to an Olympus (Center Valley, PA, USA) IX71 inverted light

173 microscope. Individual pulses of light ( $\lambda=532$  nm) from a Vector 532-1000-20 Q-switched laser

174 (Coherent, Santa Clara, CA, USA) focused through an Olympus UPlanApo 20x objective were used

175 to ablate 1/4 to 1/3 of both lateral processes (claws) of individual males. After surgery, the fly was

176 gently aspirated out of the chamber, and allowed to recover in groups of 3–5 males in food vials for

177 at least 3 d until individually paired with virgin females. Uncut control males were treated identically

178 to that as above, except that 1–2 large bristles near the apex of the abdomen were laser-ablated on

179 both sides of the body; their claws were untouched by laser light. These constitute the co-called

180 “surgical control” group used in previous work (Grieshop and Polak, 2012, 2014; Rodriguez-

181 Exposito et al., 2020).

182

### 183 **(c) Mating trials and dissections**

184 All mating trials were conducted in the morning between 8:00 am (lights on) and 11:00 am. Virgin

185 males (4–6 d of age) were each individually paired with a virgin female (3–4 d old). The onset and

186 termination of copulation were recorded, and copulation duration was taken as the difference

187 between these time points. Immediately after the termination of copulation (when the male

188 dismounted), the female was killed with ether fumes and dissected in a drop of phosphate-buffered

189 physiological saline (PBS) under an Olympus SZX12 stereomicroscope (Olympus Corp. of the

190 Americas, Center Valley, PA, USA). The female bursa was gently teased open using fine biology-  
191 grade forceps. As the sperm mass was released into the saline, it was ascertained whether it was in  
192 the form of a single mass or  $> 1$  mass. On two separate mornings, copulations were interrupted using  
193 a fine paintbrush to separate the pair. Immediately after the pair was separated, the female was  
194 dissected and the sperm mass, if present, was released from the bursa and examined, as above. A  
195 total of 12 copulations with different individuals were interrupted between 6 and 8 minutes after the  
196 start of mating. One copulation was interrupted at 4 min; no ejaculate could be detected within the  
197 female.

198

#### 199 **(d) Imaging phallic structures**

200 Genitalia were dissected from alcohol-preserved specimens, or from fresh material from culture,  
201 using a common procedure. Under a stereomicroscope, reproductive structures from fresh material  
202 for examination and imaging were dissected or extruded in a few drops of  $1\times$  phosphate buffered  
203 saline (PBS) on a depression slide and imaged immediately. For male genitalic structures, genitalia  
204 were dissected into 70% ethanol and teased free of attached pieces of exoskeleton and soft tissue  
205 using fine tweezers and dissecting probes. The specimen then was gently boiled in 1N KOH for  $\approx 8$   
206 min to dissolve soft tissue and to improve observation of the hard parts. Digital images of fresh  
207 material and boiled genital structures were captured with a Leica M205 Stereomicroscope (Leica  
208 Microsystems, Buffalo Grove, IL, USA). The light microscope images were used for 1) imaging  
209 freshly dissected reproductive structures (sperm masses, female uterus, male aedeagus and female  
210 oviscape), 2) visualizing, describing and annotating phallic and periphallid structures, and 3) for  
211 confirming the integrity of laser-surgical manipulations. For scanning electron micrograph (SEM)  
212 acquisition, specimens of fly genitalia were dissected and treated with KOH as above. They were  
213 then rinsed in distilled water, air-dried, mounted on conductive carbon adhesive tabs atop an  
214 aluminum post, adjusted for proper orientation, sputter coated with gold-palladium film, and imaged  
215 with a SCIOS Dual-Beam Scanning Electron Microscope (ThermoFisher, Waltham, MA, USA).

216 SEMs were used primarily for examining the claws for possible sperm conduit architecture, and for  
217 producing exemplars of the laser cuts. To check for sperm conduits, multiple images of the same  
218 structure were taken at different magnifications (typically between 350–3500×) and different  
219 orientations effected by motorized tilting of the specimen within the microscope chamber. Genitalic  
220 preparations of a total of 28, 29, and 3 different individuals of *D. parabipectinata*, *D. bipectinata* and  
221 *D. malerkotliana*, respectively, were imaged, and a total of 166 SEMs were examined and archived.

222

### 223 **3. Results**

#### 224 **(a) Phallic architecture of the *bipectinata* species complex**

225 The phallic structures of the *bipectinata* complex are represented here by *D. bipectinata* and  
226 *D. parabipectinata*; the same, or very similar, morphology is present in the other two species of the  
227 *bipectinata* complex (Bock, 1971). Naming the parts of the copulatory apparatus is difficult because  
228 they are exceptionally evolutionary labile, their homologies obscure (but see Rice et al., 2021), and  
229 their function often speculative.

230 The male hypandrium of the *bipectinata* complex species was imaged within the body (Fig.  
231 2A). The aedeagal lateral processes (claws) (Fig. 2) are articulated with the apex of the phallapodeme  
232 (articulation arrowed in Fig. 2D). The aedeagal lateral processes are large, curved, apically pointed  
233 and bare (Fig. 2C, D; Fig. 3A–E), approximately 90 μm in length from base to tip. They are  
234 bilaterally symmetrical, and arise from the lateral portions (“shoulders”) (Fig. 2A, D, E), not the  
235 center, of the apex of the phallapodeme (this comports with the ontogeny described by Rice et al.,  
236 2021).

237 We see no connection between the base of the pregonites and the claws (Fig. 2D, E), which  
238 confirms that the claws are also not “basal extensions” of the pregonites that exist in closely allied  
239 species in the *D. ananassae* complex (Bock and Wheeler, 1972; McEvey and Schiffer, 2015); in such  
240 species a very clear nexus exists between the pregonite and a large structure that curves and extends  
241 caudally from its base, the basal extension (McEvey and Schiffer, 2015).

242           The pregonites are small, rounded and J-shaped (Fig. 2E), with very small apical setae or  
243 “pregonal bristles” (Rice et al., 2019; Fig. 3A, B). They are derived from ventral primordial cells and  
244 are, therefore, developmentally separate from the aedeagal lateral processes and the postgonal  
245 sheath. The postgonal sheath (*sensu* Rice et al., 2021) is membranous, folds and bends freely, and it  
246 is loosely symmetrical, lobe-like and dorsal to the aedeagal lateral processes (Fig. 3A–D). When  
247 viewed via light microscopy it is largely membranous and transparent (Fig. 2C), with hardened outer  
248 ridges and leaf-like structure connected to the base of each claw (Fig. 2B–E). The postgonal sheath  
249 arises from the dorsolateral primordial cells, which, in other species, develop into postgonites  
250 (posterior parameres) (Rice et al., 2021). Postgonites are absent in the four species of the *bipectinata*  
251 complex.

252

#### 253 **(b) The traumatic insemination hypothesis**

254           We examined SEMs of the claws, including their dorsal, ventral and lateral surfaces (Fig. 3).  
255 The claws are bare and smooth on all surfaces, and when the phallopodeme is not extended, they are  
256 “cloaked” by the sheath dorsally (Fig. 3A, B). Critically, we could identify no channel, groove or  
257 fold, medially, laterally, dorsally or ventrally, on the claws that would function as a conduit for  
258 sperm. In some preparations (not shown) we observed the tip of one or both claws to have an  
259 irregular depression or lesion (typically  $\leq 1 \mu\text{m}$  in diameter), which could be a result of abrasion  
260 given the often irregular (torn) edges of these spots.

261           When females were dissected immediately upon the termination of copulation, the sperm  
262 within the bursa invariably occurred as a single mass (Fig. 4A). Out of a total of 12 matings  
263 interrupted at 6–8 min after the start of mating, 11 produced a sperm mass within the female; in all  
264 these cases the sperm likewise occurred as a single mass within the bursa (Fig. 4B). In 3 cases, the  
265 sperm mass was small and appeared irregular in shape, amorphous, not smoothly oval or rounded,  
266 but nevertheless unquestionably as a single unit.



267 The aedeagus (intromittent organ, phallus, penis) was discovered when anaesthetized  
268 copulating pairs were gently pulled apart while submerged in saline solution. This organ in *D.*  
269 *biplectinata* is translucent, membranous and pliable, and it appears to have a textured (scaly) surface  
270 (Fig. 5A). Sperm were readily identified emanating from the tip of the aedeagus (Fig 5A, B), and  
271 could be gently drawn out of the aedeagus using fine stainless steel minuten pin probes. The  
272 aedeagus itself arises from between the bases of the aedeagal lateral processes (Fig. 5B), and was not  
273 obviously apparent in any of our KOH-boiled preparations. In our SEMs, a reticulated mat of tissue  
274 between the bases of the claws could be discerned (Fig. 3F), which we interpret to be the collapsed  
275 aedeagus. In the female of the separated pair, sperm was observed emanating from the female  
276 gonopore (the orifice of her reproductive tract through which eggs also exit) (Fig. 5C), and likewise  
277 could be pulled further out of the gonopore with minuten pin probes (arrowed Fig. 5D). These  
278 observations of sperm emanating simultaneously from the male aedeagus and female gonopore in  
279 real time as pairs were gently pulled apart during mating establishes the route of sperm transfer in *D.*  
280 *biplectinata*.

281 Of the 30 total copulations with “cut” males (those whose claw tips were surgically ablated  
282 (Fig. 6)), 22 (73%) resulted in sperm transfer to the bursa (Table 1). In all of these 22 cases, the  
283 sperm dissected from the bursa immediately at the end of copulation occurred as a single mass (Fig.  
284 4C, D). Among the males that transferred ejaculate, mean (SE) copulation duration did not differ  
285 significantly between cut (10.59 (0.730) min, n = 22) and uncut control (10.12 (1.713) ± 1.77 min, n  
286 = 4) ( $t = 0.25$ ,  $df = 24$ ,  $P = 0.80$ ) males. Variance in copulation duration for cut males (12.941) was  
287 greater than that for uncut males (3.314), but not significantly so ( $P > 0.10$ ). Overall, mean  
288 copulation duration between *D. biplectinata* and *D. parabiplectinata* did not differ significantly ( $t =$   
289 0.47,  $df = 33$ ,  $P = 0.64$ ).

290 Among the 8 cut males (out of 30) that copulated but failed to transfer sperm to the female  
291 bursa, 2 males were observed to dismount but could not disengage their genitalia from that of the  
292 female, and remained fastened to the female in an end-to-end position. What appeared to be ejaculate



293 seeped out from between one pair, and remained attached to the male's terminalia after the pair  
294 finally separated (Fig. 7). This viscous, whitish mass contained sperm, verifying that it was leaked  
295 ejaculate.

296

#### 297 **4. Discussion**

298 In their authoritative review of copulatory wounding, Lange et al. (2013) listed a set of criteria for  
299 establishing the existence of traumatic mating in a given species, and here, building upon this work  
300 and that of Tataric et al. (2014), we assemble a set of criteria for establishing the occurrence of TI.  
301 We suggest that evidence for TI should minimally include: *i*) a specific wounding structure(s) that  
302 demonstrably breaches the female body wall; *ii*) physical features of said structure(s), such as a  
303 canal, lumen, groove and/or pore, for the transfer and delivery of spermatozoa; and *iii*) the transfer of  
304 spermatozoa across the female body wall.

305 Several studies have demonstrated TI by fulfilling these criteria (e.g., Davis, 1956; Carayon,  
306 1966; Řezáč, 2009; Tataric and Cassis, 2010), a paradigmatic example of which occurs in bed bugs  
307 (Cimicidae) (Carayon, 1966; Usinger, 1966; Benoit, 2011). Copulation in several cimicid species has  
308 been observed directly, and it has been unambiguously documented to involve males breaching the  
309 female's body wall with their needle-like "parameres", often stabbing the female multiple times  
310 during a single mating event, and demonstrably transferring sperm into her body cavity (Carayon,  
311 1966). The needle-like paramere, with its readily discernible channel and subterminal pore (Fig. 1),  
312 are phenotypic features that reflect the paramere's function in TI (Siva-Jothy, 2006).

313 In contrast, we contend that none of the above criteria for demonstrating TI were  
314 convincingly met by K2007. In the first place, whereas K2007 claims that integumental penetration  
315 is achieved by the claws, stating that they "...pierce the pockets during copulation..." (p. 403), there  
316 was no direct evidence presented for physical penetration of the female body wall (nor the genital  
317 tract for that matter). The presence of melanized patches in mated females was presented, but this is  
318 not decisive evidence for penetration of the integument. Such scarring cannot exclude other possible

319 causes such as surface injury without perforation, and in any event such lesions are known to occur  
320 during mating without insemination in other species (Merrit, 1989; Blankenhorn et al., 2002;  
321 Kamimura, 2010; Lange et al., 2013). The second criterion (the functional morphology of the organ)  
322 was not fulfilled either, as convincing visual evidence for a structure that could guide and transfer  
323 sperm across the female body wall was also not provided, and according to the present investigation,  
324 does not exist (and see below). Finally, although K2007 claimed that "...sperm is ejaculated through  
325 the wounds but not through the genital orifice" (p. 404), pink areas of coloration in a laser scan  
326 micrograph were presented as evidence for this claim, which, to us, is insufficient since the presence  
327 of sperm within these pink "clouds" was not confirmed, let alone evidence of sperm transfer via the  
328 claws to the reproductive tract.

329         Here, we examined SEMs of the dorsal, lateral and ventral surfaces of the claws in *D.*  
330 *parabipectinata* and *D. bipectinata*, and discerned no obvious "groove" that could transport sperm.  
331 We also evaluated the assertion that the paired claws serve to inject sperm into the reproductive tract,  
332 by testing the prediction that immediately after and/or during mating, the ejaculatory material within  
333 the female should be discernable as two distinct masses. This prediction failed, as sperm invariably  
334 occurred as a single mass. This outcome aligns with previous work on the reproductive biology of *D.*  
335 *bipectinata*: in all cases, the sperm dissected from the bursa immediately after copulation occurred as  
336 a single mass (Tyler et al., 2021).

337         The aedeagus (intromittent organ, phallus, penis) in the *bipectinata* complex has been  
338 notoriously difficult to detect and characterize. Throughout the genus *Drosophila*, the aedeagus is  
339 usually a tubular organ with an external opening, a phallosome or gonopore. The organ itself is  
340 usually membranous, often expanded apically and hirsute or irregularly papillate (Bock and Wheeler,  
341 1972). K2007 suggested that in the *bipectinata* species complex, the aedeagus had diminished to "a  
342 degenerate, transparent, tube-like true aedeagus" (p. 403), while Rice et al. (2021) referred to the  
343 aedeagus as "translucent" and outlined the area where it ought to be located in *D. malerkotliana*,  
344 between the paired lateral processes (figure 2G in Rice et al., 2021). Here, for the first time we have

345 imaged the everted aedeagus (in *D. bipectinata*) through adopting a method of gently separating  
346 copulating pairs while under ether anesthesia and submerged in saline solution. Pulling pairs apart  
347 during coupling extruded the male aedeagus and clearly showed sperm emanating from its tip and  
348 simultaneously from the female vaginal opening (her gonopore). Sperm emanating from these male  
349 and female structures in real time identifies the path of sperm transfer to the female, and explains  
350 why the sperm mass invariably consists of a single integrated unit, and why males with cut claw tips  
351 were able to inseminate females. The aedeagus is a translucent, membranous, and highly pliable  
352 tube-like structure that appears to readily collapse upon itself. These characteristics suggest why the  
353 aedeagus has been difficult to detect in previous works.

354         We also tested the prediction of the TI hypothesis that after experimentally eliminating the  
355 sharp terminal ends of the claws, insemination should be inhibited. This prediction also failed, as a  
356 plurality of males without these sharp ends successfully inseminated females. In matings with ablated  
357 males (claw tips removed), 73% resulted in insemination, and in *all* these cases, the sperm occurred  
358 as the typical single mass within the female reproductive tract. In all of our experimental males with  
359 cut claws, the efficacy of the surgery was verified afterwards; all surgeries had successfully removed  
360 the apical third to apical half of both aedeagal lateral processes (claws).

361         Taken together, the results refute the hypothesis of TI in the *bipectinata* species complex, and  
362 therefore in *Drosophila*, and for that matter in Diptera as far as we know. Sperm transfer in the  
363 *bipectinata* complex occurs from the male aedeagus into the female reproductive tract via her  
364 gonopore, and comports with knowledge about other *Drosophila* species including *D. melanogaster*.  
365 An alternative possibility is that the claws may serve to transfer (or secrete) fluid, and therefore  
366 function in “traumatic secretion transfer” (Lange et al., 2013), evidence for which occurs in the seed  
367 beetle *Callosobruchus maculatus* (Hotzy et al., 2012) and blowfly *Lucilia cuprina* (Merritt, 1989),  
368 possibly accounting for the pink areas highlighted in K2007’s images. This idea, however, is  
369 speculative, and we have no evidence for or against it.

370 From our observations of matings in *D. bipectinata* and *D. parabipectinata*, the most likely  
371 functions of the claws that we can discern are at least three-fold, all of which are mechanical in  
372 nature. We emphasize, however, that additional experiments are needed to fully characterize the  
373 function of these remarkable structures, but which are beyond the scope of the present study. Here,  
374 our primary focus was to address the TI hypothesis in and of itself.

375 A first potential function we may deduce from our data is that the claws serve to assist the  
376 male in achieving copulation by facilitating the grasping of the female. In 10 out of 30 cases of  
377 copulations with cut males, males were observed to mount the female, probe the female terminalia  
378 with their own genitalia, but failed to achieve genital coupling in these attempts (some later did). A  
379 grasping function has been demonstrated for the sharp (periphallic) spines emanating from the male  
380 ventral cercal lobes in *D. bipectinata* (Polak and Rashed, 2010) and *D. ananassae* (Grieshop and  
381 Polak, 2012). More generally, male genital clasping devices, such as spines, hooks, inflatable  
382 organs/structures, and other interlocking features, occur in a wide range of invertebrate species to  
383 function in achieving union and genital integration, holding the female securely, and protecting her  
384 from rival males (Thornhill and Alcock, 1983; Eberhard, 1985; Gwynne, 1998; Simmons, 2001).

385 A second apparent function may be to assist in the opening of the female gonopore. In 2 of  
386 the above 10 instances of cut males failing to couple, males were observed to use their periphallic  
387 structures (surstyli or claspers) to probe and apparently attempt to part the female ovipositor, but  
388 failed to do so, and failed to achieve union. These observations suggest that the female ovipositor  
389 could not be opened as a result of the males lacking intact claws.

390 A third non-mutually exclusive function we believe is one for anchoring—to brace the male  
391 genitalia to allow the intromittent organ (aedeagus) to evert through the female gonopore into the  
392 vagina. A firm integration of the genitalia should assure transfer of ejaculate from the aedeagus to the  
393 female. Passage of the aedeagus through the female gonopore could also be facilitated or provided by  
394 the physical opening of the gonopore by the abduction of the claws. A relevant observation here is  
395 that there were 2 cases (out of 8) in which cut males remained “adhered” to the female after

396 dismounting, suggesting that ejaculate failed to transfer to the female because of poor union of the  
397 genitalia, seeped from between the pair, and acted as an adhesive that then unnaturally prolonged  
398 genital coupling. Sperm seepage is consistent with clawless males being unable to adequately insert  
399 the aedeagus into the gonopore and/or effectively maintain their genitalia integrated with that of the  
400 female during copulation. Ejaculate seepage during coupling was directly observed in one case (Fig.  
401 7).

402         When TI occurs in a given species, it is predicted to impose a number of potential costs to  
403 females, some of which will be unique relative to other forms of copulatory wounding. In cases of  
404 TI, we may expect females to incur specific fitness costs associated not only with wound healing,  
405 immune system activation and risk of infection of the hemocoel and internal organs, but also with the  
406 physiological challenges stemming from the introduction of seminal fluid and spermatozoa into the  
407 hemolymph (Davis, 1956; Morrow and Arnqvist, 2003; Siva-Jothy, 2009). This latter cost could also  
408 encompass loss of control over fertilization that would normally be available to females where  
409 insemination occurs via the female reproductive tract (Eberhard, 1996; Beani et al., 2005). Our  
410 ability to predict such costs to females, and to interpret aspects of female reproductive anatomy,  
411 physiology, and behaviour, that evolve in response to sexual conflict linked to mating (Lessels, 2006;  
412 Parker, 2006; Yassin and Orgogozo, 2013), rests upon accurately describing and classifying the  
413 highly varied forms of copulatory trauma that exist in animals. The results of the present study lead  
414 us to reject the assertion that TI occurs in species of the *Drosophila bipectinata* complex.

415

416 **Competing interests.** The authors declare that they have no competing interests.

417

418 **Funding.** We thank the National Science Foundation (USA) grant DEB-1654417 for partial support  
419 of this study, and the Australian Museum Research Institute, Sydney, for providing resources making  
420 this work possible.

421 **Acknowledgements.** We thank Melodie Fickenscher of the Advanced Materials Characterization  
422 Center at University of Cincinnati for her expertise in taking the SEMs, and Joshua B. Benoit for the  
423 bed bug specimen and for helpful discussions.

424

## 425 **References**

426 Alonso-Pimentel, H., Tolbert, L.P., and Heed, W.B. (1994) Ultrastructural examination of the  
427 insemination reaction in *Drosophila*. *Cell and Tissue Research* 275: 467–479.

428 <https://doi.org/10.1007/BF00318816>

429 Arnqvist, G., and Rowe, L. (2005) *Sexual Conflict*. Princeton University Press, Princeton.

430 Bairati, A. (1968) Structure and ultrastructure of the male reproductive system in *Drosophila*  
431 *melanogaster* Meig 2. The genital duct and accessory glands. *Monitore Zoologico Italiano*  
432 (N. S.) 2: 105–182.

433 Beani, L., Giusti, F., Mercati, D., Lupetti, P., Paccagnini, E., Turillazzi, S., and Dallai, R. (2005)  
434 Mating of *Xenos vesparum* (Rossi) (Strepsiptera, Insecta) revisited. *Journal of Morphology*  
435 265: 291–303. <https://doi.org/10.1002/jmor.10359>

436 Benoit, J.B. (2011) Stress tolerance of bed bugs: A review of factors that cause trauma to *Cimex*  
437 *lectularius* and *C. Hemipterus*. *Insects* 2: 151–172. <https://doi.org/10.3390/insects2020151>

438 Blanckenhorn, W.U., Hosken, D.J., Martin, O.Y., Reim, C., Teuschl, Y., and Ward, P.I. (2002) The  
439 costs of copulating in the dung fly *Sepsis cynipsea*. *Behavioral Ecology* 13: 353–358.

440 <https://doi.org/10.1093/beheco/13.3.353>

441 Bock, I.R. (1971) Taxonomy of the *Drosophila bipectinata* complex. *The University of Texas*  
442 *Publication* 7103: 273–280.

443 Bock, I.R., and Wheeler, M.R. (1972) The *Drosophila melanogaster* species group. In: *Studies in*  
444 *Genetics VII*. ed. M.R. Wheeler. *The University of Texas Publication* 7213: 1–102.

445 Brand, J.N., Viktorin, G., Wiberg, R.A.W., Beisel, C., Harmon, L.J., and Schärer, L. (2021) Frequent  
446 origins of traumatic insemination involve convergent shifts in sperm and genital morphology.  
447 *bioRxiv*, <https://doi.org/10.1101/2021.02.16.431427>

448 Carayon, J. (1966) Traumatic insemination and the paragenital system. In: *Monograph of Cimicidae.*  
449 *Thomas Say Foundation (Series)*, vol. 7, ed. R.L. Usinger. *Entomological Society of America*  
450 pp. 81–166.

451 Davis, N.T. (1956) The morphology and functional anatomy of the male and female reproductive  
452 systems of *Cimex lectularius* L. (Heteroptera, Cimicidae). *Annals of the Entomological*  
453 *Society of America* 49: 466–493. <https://doi.org/10.1093/aesa/49.5.466>

- 454 Dougherty, L.R., van Lieshout, E., McNamara, K.B., Moschilla, J.A., Arnqvist, G., and Simmons,  
455 L.W. (2017) Sexual conflict and correlated evolution between male persistence and female  
456 resistance traits in the seed beetle *Callosobruchus maculatus*. *Proceedings of the Royal*  
457 *Society of London Series B: Biological Sciences* 284: 20170132.  
458 <https://doi.org/10.1098/rspb.2017.0132>
- 459 Eberhard, W.G. (1985) *Sexual Selection and Animal Genitalia*. Harvard University Press,  
460 Cambridge, MA.
- 461 Eberhard, W.G. (1996) *Female Control: Sexual Selection by Cryptic Female Choice*. Princeton  
462 University Press, Princeton, N.J.
- 463 Eberhard, W.G., and Ramirez, N. (2004) Functional morphology of the male genitalia of four species  
464 of *Drosophila*: failure to confirm both lock and key and male-female conflict predictions.  
465 *Annals of the Entomological Society of America* 97: 1007–1017.  
466 [https://doi.org/10.1603/0013-8746\(2004\)097\[1007:FMOTMG\]2.0.CO;2](https://doi.org/10.1603/0013-8746(2004)097[1007:FMOTMG]2.0.CO;2)
- 467 Fowler, G.L. (1973) Some aspects of the reproductive biology of *Drosophila*: sperm transfer, sperm  
468 storage, and sperm utilization. *Advances in Genetics* 17: 293–360.  
469 [https://doi.org/10.1016/S0065-2660\(08\)60173-X](https://doi.org/10.1016/S0065-2660(08)60173-X)
- 470 Futuyma, D.J., and Kirkpatrick, M. (2017) *Evolution*, fourth edition. Sinauer, Sunderland, MA.
- 471 Grieshop, K., and Polak, M. (2012) The precopulatory function of male genital spines in *Drosophila*  
472 *ananassae* [Doleschall] (Diptera: Drosophilidae) revealed by laser surgery. *Evolution* 66:  
473 2637–2645. <https://doi.org/10.1111/j.1558-5646.2012.01638.x>
- 474 Grieshop, K., and Polak, M. (2014) Evaluating the post-copulatory sexual selection hypothesis for  
475 genital evolution reveals evidence for pleiotropic harm exerted by the male genital spines of  
476 *Drosophila ananassae*. *Journal of Evolutionary Biology* 27: 2676–2686.  
477 <https://doi.org/10.1111/jeb.12524>
- 478 Gupta, J.P. (1973) Comparative studies of male genital structures of hybrids and their parental  
479 species. *Experientia* 29: 224–225. <https://doi.org/10.1007/BF01945490>
- 480 Gwynne, D.T. (1998) Genitally does it. *Nature* 393: 734–735. <https://doi.org/10.1038/31587>
- 481 Hotzy, C., Polak, M., Rönn, J.L., and Arnqvist, G. (2012) Phenotypic engineering unveils the  
482 function of genital morphology. *Current Biology* 22: 2258–2261.  
483 <https://doi.org/10.1016/j.cub.2012.10.009>
- 484 Hosken, D.J., Martin, O.Y., Born, J., and Huber, F. (2003) Sexual conflict in *Sepsis cynipsea*: female  
485 reluctance, fertility and mate choice. *Journal of Evolutionary Biology* 16: 485–490.  
486 <https://doi.org/10.1046/j.1420-9101.2003.00537.x>
- 487 Jagadeeshan, S., and Singh, R.S. (2006) A time-sequence functional analysis of mating behaviour  
488 and genital coupling in *Drosophila*: role of cryptic female choice and male sex-drive in the



- 489 evolution of male genitalia. *Journal of Evolutionary Biology* 19: 1058–1070.  
490 <https://doi.org/10.1111/j.1420-9101.2006.01099.x>
- 491 Johnstone, R.A., and Keller, L. (2000) How males can gain by harming their mates: sexual conflict,  
492 seminal toxins, and the cost of mating. *American Naturalist* 156: 368–377.  
493 <https://doi.org/10.1086/303392>
- 494 Kamimura, Y. (2007) Twin intromittent organs of *Drosophila* for traumatic insemination. *Biology*  
495 *Letters* 3: 401–404. <https://doi.org/10.1098/rsbl.2007.0192>
- 496 Kamimura, Y. (2010) Copulation anatomy of *Drosophila melanogaster* (Diptera: Drosophilidae):  
497 Wound-making organs and their possible roles. *Zoomorphology* 129: 163–174.  
498 <https://doi.org/10.1007/s00435-010-0109-5>
- 499 Lange, R., Reinhardt, K., Michiels, N.K., and Anthes, N. (2013) Functions, diversity, and evolution  
500 of traumatic mating. *Biological Reviews* 88: 585–601. <https://doi.org/10.1111/brv.12018>
- 501 Lefevre, G., and Jonsson, U.B. (1962) Sperm transfer, storage, displacement, and utilization in  
502 *Drosophila melanogaster*. *Genetics* 47: 1719–1736.  
503 <https://doi.org/10.1093/genetics/47.12.1719>
- 504 Lessels, C.M. (2006) The evolutionary outcome of sexual conflict. *Philosophical Transactions of the*  
505 *Royal Society B: Biological Sciences* 361: 301–317. <https://doi.org/10.1098/rstb.2005.1795>
- 506 Manier, M.K., Belote, J.M., Berben, K.S., Lüpold, S., Ala-Honkola, O., Collins, W.F., and Pitnick, S.  
507 (2013) Rapid diversification of sperm precedence traits and processes among three sibling  
508 *Drosophila* species. *Evolution* 67: 2348–2362. <https://doi.org/10.1111/evo.12117>
- 509 Manier, M.K., Belote, J.M., Berben, K.S., Novikov, D., Stuart, W.T., and Pitnick, S. (2010)  
510 Resolving mechanisms of competitive fertilization success in *Drosophila melanogaster*.  
511 *Science* 328: 354–357. <https://doi.org/10.1126/science.1187096>
- 512 Markow, T.A., and Ankney, P.F. (1988) Insemination reaction in *Drosophila*: found in species  
513 whose males contribute material to oocytes before fertilization. *Evolution* 42: 1097–1101.  
514 <https://doi.org/10.2307/2408926>
- 515 Mattei, A.L., Riccio, M.L., Avila, F.W., and Wolfner, M.F. (2015) Integrated 3D view of postmating  
516 responses by the *Drosophila melanogaster* female reproductive tract, obtained by micro-  
517 computed tomography scanning. *Proceedings of the National Academy of Sciences of the*  
518 *United States of America, USA* 112: 8475–8480. <https://doi.org/10.1073/pnas.1505797112>
- 519 McEvey, S.F., and Schiffer, M. (2015) New species in the *Drosophila ananassae* subgroup from  
520 northern Australia, New Guinea and the South Pacific (Diptera: Drosophilidae), with  
521 historical overview. *Records of the Australian Museum* 67: 129–161.  
522 <https://doi.org/10.3853/j.2201-4349.67.2015.1651>



- 523 Merritt, D.J. (1989) The morphology of the phallosome and accessory gland material transfer during  
524 copulation in the blowfly, *Lucilia cuprina* (Insecta, Diptera). *Zoomorphology* 108: 359–366.  
525 <https://doi.org/10.1007/BF00312276>
- 526 Michiels, N.K., and Newman, L.J. (1998) Sex and violence in hermaphrodites. *Nature* 391: 647.  
527 <https://doi.org/10.1038/35527>
- 528 Morrow, E.H., and Arnqvist, G. (2003) Costly traumatic insemination and a female counter-  
529 adaptation in bed bugs. *Proceedings of the Royal Society of London Series B: Biological*  
530 *Sciences* 270: 2377–2381. <https://doi.org/10.1098/rspb.2003.2514>
- 531 Morrow, E.H., Arnqvist, G., and Pitnick, S. (2003) Adaptation versus pleiotropy: why do males harm  
532 their mates? *Behavioral Ecology* 14: 802–806. <https://doi.org/10.1093/beheco/arg073>
- 533 Okada, T. (1954) Comparative morphology of the drosophilid flies. I Phallic organs of the  
534 *melanogaster* group. *Kontyû* 22: 36–46.
- 535 Parker, G.A. (2006) Sexual conflict over mating and fertilization: an overview. *Philosophical*  
536 *Transactions of the Royal Society B: Biological Sciences* 361: 235–259.  
537 <https://doi.org/10.1098/rstb.2005.1785>
- 538 Parshad, R., and Paika, I.J. (1964) Drosophilid survey of India. II. Taxonomy and cytology of the  
539 subgenus *Sophophora* (*Drosophila*). *Research Bulletin of the Punjab University* 15: 225–252.
- 540 Patterson, J.T. (1946) A new type of isolating mechanism in *Drosophila*. *Proceedings of the National*  
541 *Academy of Sciences of the United States of America, USA* 32: 202–208.  
542 <https://doi.org/10.1073/pnas.32.7.202>
- 543 Pitnick, S., and Markow, T.A. (1994) Male gametic strategies: sperm size, testes size, and the  
544 allocation of ejaculate among successive mates by the sperm-limited fly *Drosophila pachea*  
545 and its relatives. *The American Naturalist* 143: 785–819. <https://doi.org/10.1086/285633>
- 546 Polak, M., Hurtado-Gonzales, J.L., Benoit, J.B., Hooker, K.J., and Tyler, F. (2021) Positive genetic  
547 covariance between male sexual ornamentation and fertilizing capacity. *Current Biology* 31:  
548 1547–1554. <https://doi.org/10.1016/j.cub.2021.01.046>
- 549 Polak, M., and Rashed, A. (2010) Microscale laser surgery reveals adaptive function of male  
550 intromittent genitalia. *Proceedings of the Royal Society B: Biological Sciences* 277: 1371–  
551 1376. <https://doi.org/10.1098/rspb.2009.1720>
- 552 Polak, M., Starmer, W.T., and Barker, J.S.F. (1998) A mating plug and male mate choice in  
553 *Drosophila hibisci* Bock. *Animal Behaviour* 56: 919–926.  
554 <https://doi.org/10.1006/anbe.1998.0850>
- 555 Reinhardt, K., Anthes, N., and Lange, R. (2015) Copulatory wounding and traumatic insemination.  
556 *Cold Spring Harbor Perspectives in Biology* 7: a017582.  
557 <https://doi.org/10.1101/cshperspect.a017582>

- 558 Řezáč, M. (2009) The spider *Harpactea sadistica*: co-evolution of traumatic insemination and  
559 complex female genital morphology in spiders. *Proceedings of the Royal Society of London*  
560 *Series B: Biological Sciences* 276: 2697–2701. <https://doi.org/10.1098/rspb.2009.0104>
- 561 Rice, G., David, J.R., Kamimura, Y., Masly, J.P., McGregor, A.P., Nagy, O., Noselli, S., Nunes,  
562 M.D.S., O’Grady, P., Sánchez-Herrero, E., Siegal, M.S., Toda, M.J., Rebeiz, M., Courtier-  
563 Orgogozo, V., and Yassin, A. (2019) A standardized nomenclature and atlas of the male  
564 terminalia of *Drosophila melanogaster*. *Fly* 13: 51–64.  
565 <https://doi.org/10.1080/19336934.2019.1653733>
- 566 Rice, G., David, J.R., Gompel, N., Yassin, A., and Rebeiz, M. (2021) Resolving between novelty and  
567 homology in the rapidly evolving phallus of *Drosophila*. *bioRxiv*.  
568 <https://doi.org/10.1101/2021.04.14.439817>
- 569 Rodriguez-Exposito, E., Garcia-Gonzalez, F., and Polak, M. (2020) Individual and synergistic effects  
570 of male external genital traits in sexual selection. *Journal of Evolutionary Biology* 33: 67–79.  
571 <https://doi.org/10.1111/jeb.13546>
- 572 Rönn, J., Katvala, M., and Arnqvist, G. (2007) Coevolution between harmful male genitalia and  
573 female resistance in seed beetles. *Proceedings of the National Academy of Sciences of the*  
574 *United States of America, USA* 104: 10921–10925. <https://doi.org/10.1073/pnas.0701170104>
- 575 Simmons, L.W. (2001) Sperm Competition and its Evolutionary Consequences in Insects. Princeton  
576 University Press, Princeton, NJ.
- 577 Siva-Jothy, M.T. (2006) Trauma, disease and collateral damage: conflict in cimicids. *Philosophical*  
578 *Transactions of the Royal Society B: Biological Sciences* 361: 269–275.  
579 <https://doi.org/10.1098/rstb.2005.1789>
- 580 Siva-Jothy, M.T. (2009) Reproductive immunity. In: *Insect Infection and Immunity: Ecology,*  
581 *Evolution and Mechanisms*, ed. J. Rolff and S. Reynolds. Oxford University Press, Oxford,  
582 pp. 241–251. <https://doi.org/10.1093/acprof:oso/9780199551354.003.0015>
- 583 Tataric, N.J., and Cassis, G. (2010) Sexual coevolution in the traumatically inseminating plant bug  
584 genus *Coridromius*. *Journal of Evolutionary Biology* 23: 1321–1326.  
585 <https://doi.org/10.1111/j.1420-9101.2010.01991.x>
- 586 Tataric, N.J., Cassis, G., and Siva-Jothy, M.T. (2014) Traumatic insemination in terrestrial  
587 arthropods. *Annual Review of Entomology* 59: 245–261. <https://doi.org/10.1146/annurev-ento-011613-162111>
- 589 Thornhill, R., and Alcock, J. (1983) *The Evolution of Insect Mating Systems*. Harvard University  
590 Press, MA.

- 591 Tyler, F., Haverkos, S., Imm, A., and Polak, M. (2021) Analysis of correlated responses in key  
592 ejaculatory traits to artificial selection on a diversifying secondary sexual trait. *Journal of*  
593 *Insect Physiology* 133: 104291. <https://doi.org/10.1016/j.jinsphys.2021.104291>
- 594 Usinger, R. (1966) *Monograph of the Cimicidae*. Entomological Society of America, Philadelphia,  
595 PA.
- 596 Yassin, A., and Orgogozo, V. (2013) Coevolution between male and female genitalia in the  
597 *Drosophila melanogaster* species subgroup. *PloS ONE* 8: e57158.  
598 <https://doi.org/10.1371/journal.pone.0057158>

Table 1. Number of ejaculates transferred to the female bursa as a single mass in male *D.*

*parabipectinata* and *D. bipectinata*. The aedeagal lateral processes (claws) were cut with an ultraprecise surgical laser; the uncut treatment group consisted of surgical controls. Cut males had approximately 1/3–1/2 the distal ends of both aedeagal lateral processes ablated (Fig. 6). All females were dissected immediately after pairs separated. In all cases of ejaculate transfer, the sperm occurred as a single mass within the female bursa irrespective of whether the male was cut or uncut.

| Species                   | Surgical treatment | Number pairs set up | Number copulations | Number copulations resulting in ejaculate transfer | Number of ejaculates as a single mass |
|---------------------------|--------------------|---------------------|--------------------|----------------------------------------------------|---------------------------------------|
| <i>D. parabipectinata</i> | Cut                | 8                   | 6                  | 5                                                  | 5                                     |
|                           | Uncut              | 2                   | 2                  | 2                                                  | 2                                     |
| <i>D. bipectinata</i>     | Cut                | 34                  | 24                 | 17                                                 | 17                                    |
|                           | Uncut              | 3                   | 3                  | 3                                                  | 3                                     |
| Total                     | Cut                | 42                  | 30                 | 22                                                 | 22                                    |
|                           | Uncut              | 5                   | 5                  | 5                                                  | 5                                     |

## Figures

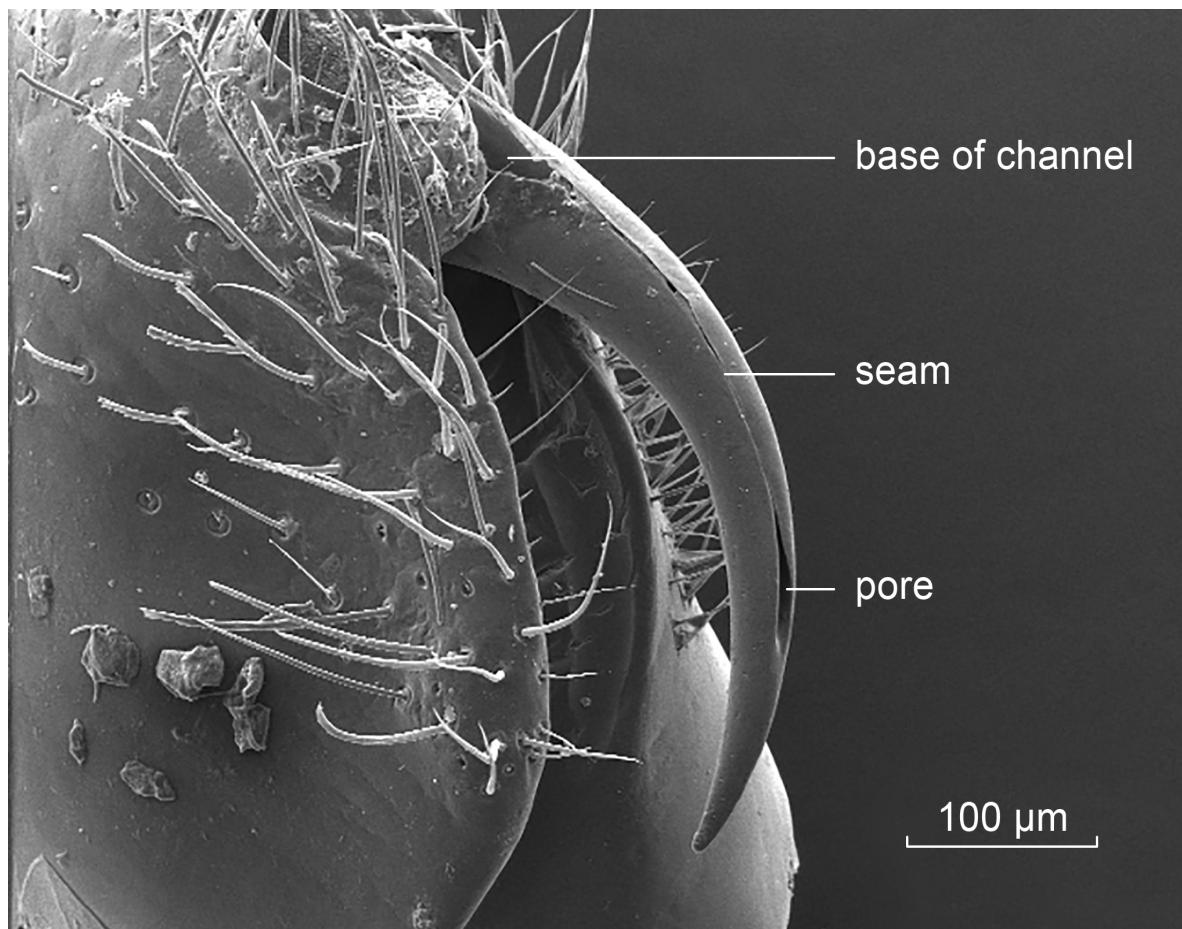

**Figure 1.** Scanning electron micrograph (200 $\times$ ) of the curved and tapered copulatory organ (the paramere, Usinger, 1966) of the bed bug, *Cimex lectularius* L. During mating, the paramere can be seen in real time to puncture the female abdominal integument (Usinger, 1966). The channel (groove) of the paramere extends from its base to the subterminal pore (c.  $65 \times 10 \mu\text{m}$ ); the aedeagus is everted through the channel and ejaculate injected into the female (Davis, 1956; Usinger, 1966).



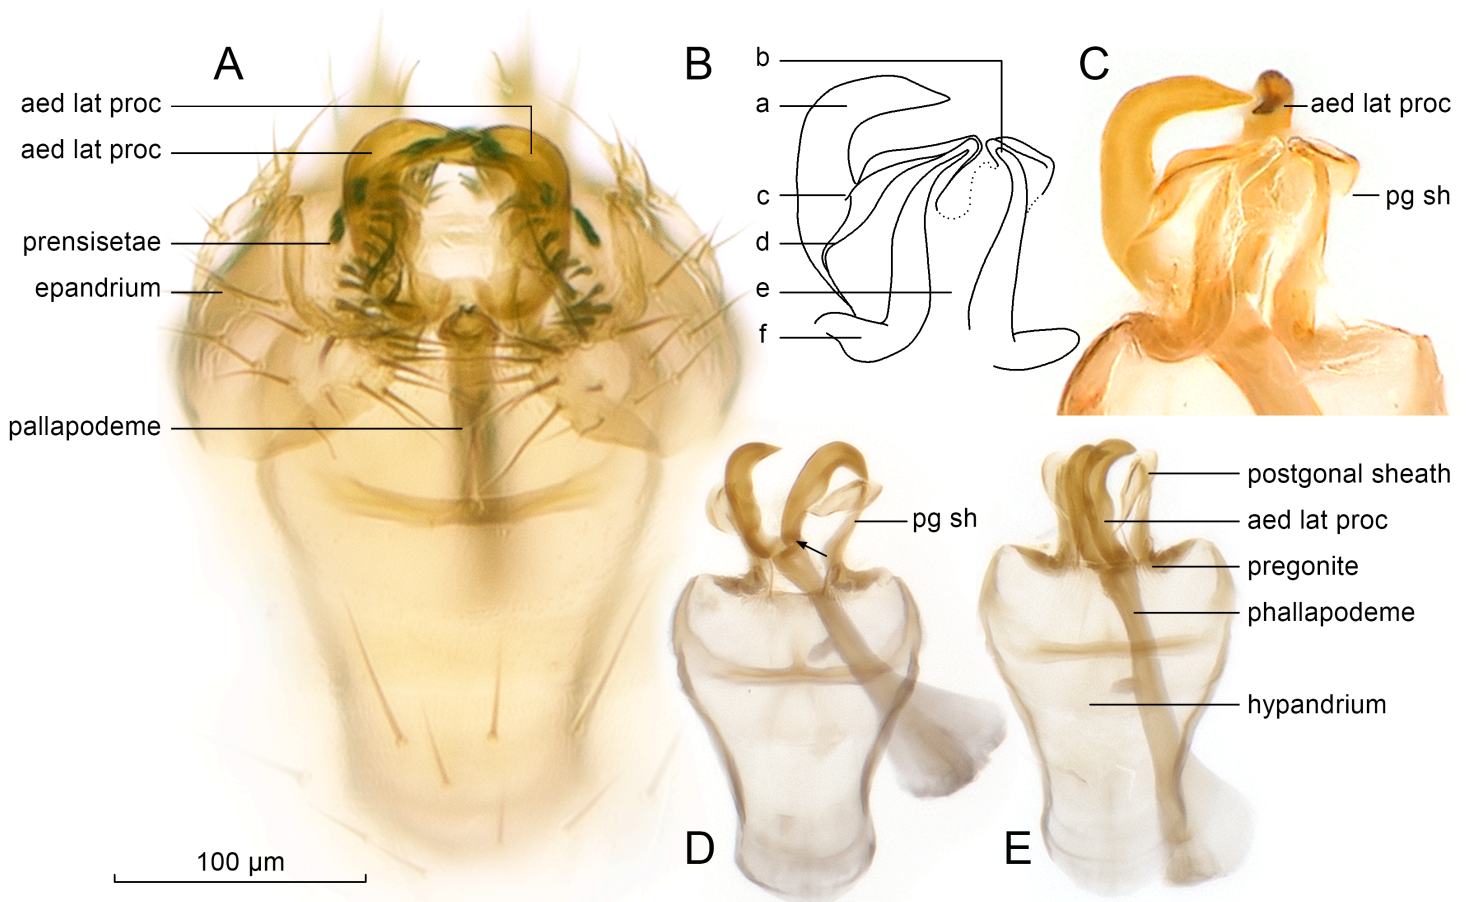

**Figure 2.** Light microscope images of the phallic structures of the *bipectinata* complex. **(A)** Posterior end of the undissected male body viewed from below; the hyandrium is inside the body, surrounded by the epandrium. **(B, C)** Drawing and magnified view, after dissection, of the posterior end of the hyandrium, showing the aedeagal lateral processes (aed lat proc) and the postgonal sheath (pg sh). The sheath surrounds the phallic structures dorsally; it is largely membranous (e) but ridges and thickened processes (b, c, d, f) are evident within. **(D, E)** Views of the hyandrium in its entirety. Images show the aedeagal lateral processes and postgonal sheath in two phallapodeme orientations (projected and withdrawn, respectively), as well as the articulation of the aedeagal lateral process (arrowed in D) at the posterior end of the phallapodeme. Specimens: (A) *D. bipectinata* (Cape Tribulation, Australia | 16.104°S 145.455°E | 2011 | M. Polak & S.F. McEvey); (B, C) *D. bipectinata* (Taipei, Taiwan | 25°2'30.24"N, 121°36'39.37"E | 2017 | M. Polak); (D, E) *D. parabiptinata* (Christmas Island [nr Java] | 10°30'S 105°35'E | 2003 | S.F. McEvey et al. [Australian Museum]).

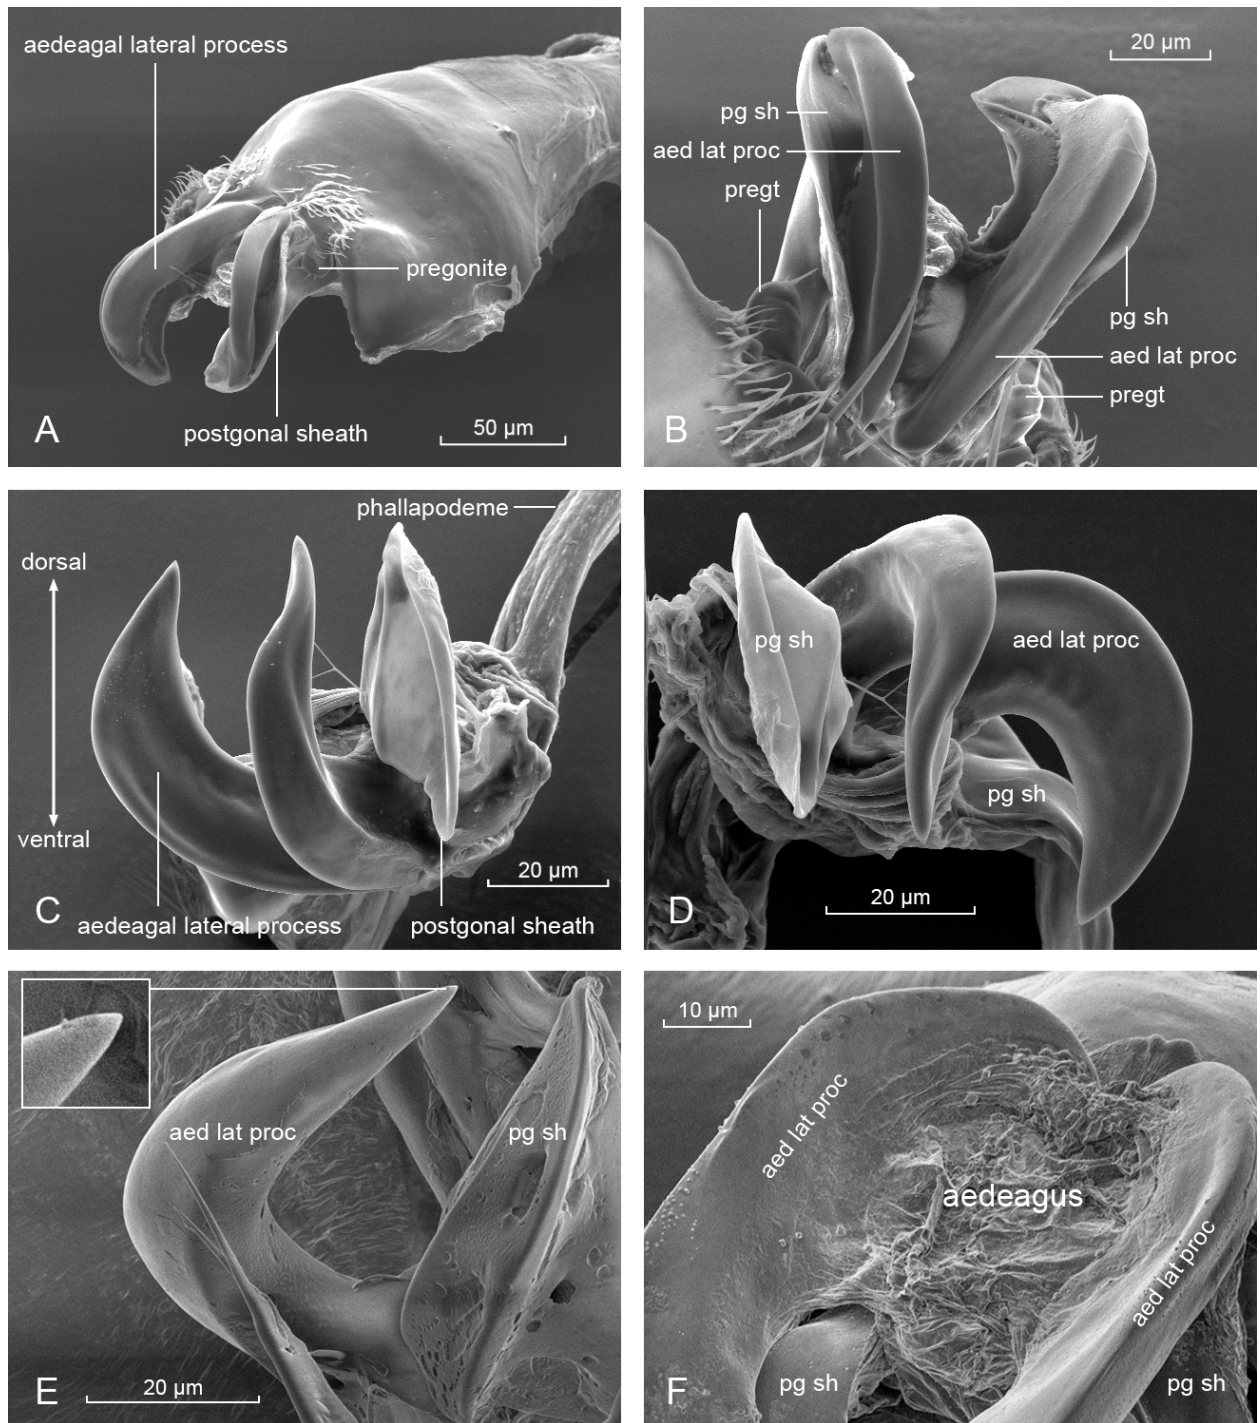

**Figure 3.** Scanning electron micrographs of the aedeagal lateral processes (aed lat proc) in the *bipectinata* complex. Aedeagal lateral processes were imaged at different orientations and magnifications to allow detailed examination of all surfaces, which failed to reveal purported conduits (grooves or channels) for sperm transport. **(A)** Ventral surface of hypandrium with the pair of aedeagal lateral processes, sheathed in the postgonal sheath (pg sh); the small pregonite (pregt) with apical setae arises from the gonocoxite. **(B)** Strong, rounded, bare, ventral surfaces of the aedeagal lateral processes with the postgonal sheath extending beyond (and possibly protecting) the sharp tips. Pregonite (pregt) with apical sensilla. **(C)** Smooth, bare, seamless, ventral and lateral surfaces of the aedeagal lateral

processes; no gonopore (phallotrema) present; thickened edges and internal “ribs” of the postgonal sheath visible (see also D, and Fig. 2B, C). **(D)** Ventral and lateral faces of the aedeagal lateral processes, in relation to the lobes of the postgonal sheath. **(E)** Surfaces of aedeagal lateral process. Inset shows intact tip, which occasionally carries a lesion, possibly an abrasion (not shown). **(F)** Reticulated mat of tissue between the bases of the aedeagal lateral processes, interpreted to be the collapsed aedeagus (see Fig. 5A, B). Specimens: (A–D) *D. parabiplectinata*, (E, F) *D. biplectinata* (Taipei, Taiwan | 25°2'30.24"N, 121°36'39.37"E | 2017 | M. Polak).



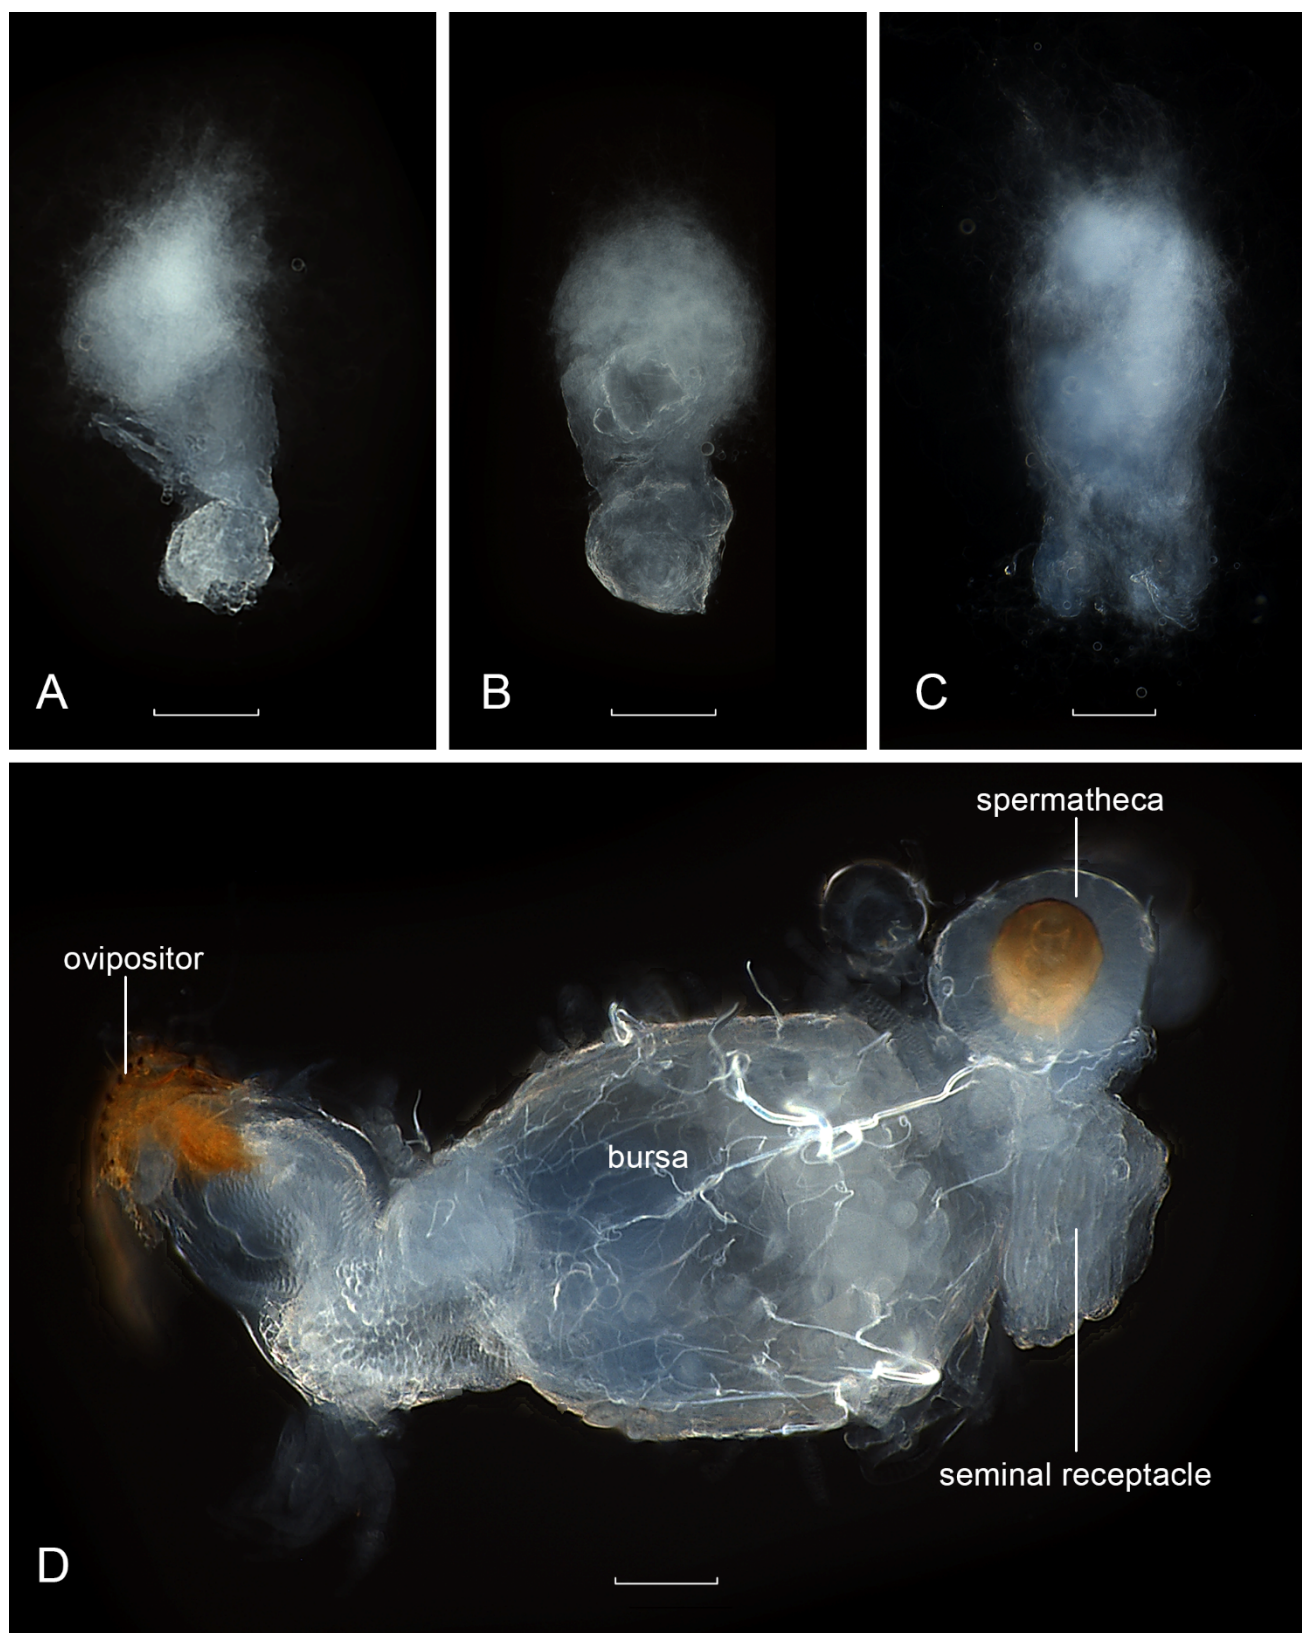

**Figure 4.** Light microscope images exemplifying the single sperm mass in *D. bipunctinata*. Masses were dissected intact from the female reproductive tract (A) immediately after the end of a full-

length, uninterrupted copulation, and **(B)** immediately after the pair was experimentally separated at 8 min or less after the onset of genital coupling; uninterrupted copulation duration in this species is on average about 10.6 min (Polak et al., 2021). At the base of each mass, the gelatinous ("waxy") component of the ejaculate is clearly visible, which is also present in *D. melanogaster* and in other species to varying degrees of expression (Bairati and Perotti, 1970; Alonso-Pimentel et al., 1994; Polak et al., 1998; Manier et al., 2010). **(C)** Sperm mass dissected from the bursa after copulation with a male with both aedeagal lateral process tips ablated. **(D)** Intact bursa of a female, full of sperm, after mating with a male with both aedeagal lateral process tips ablated. Scale bars = 200  $\mu\text{m}$ .

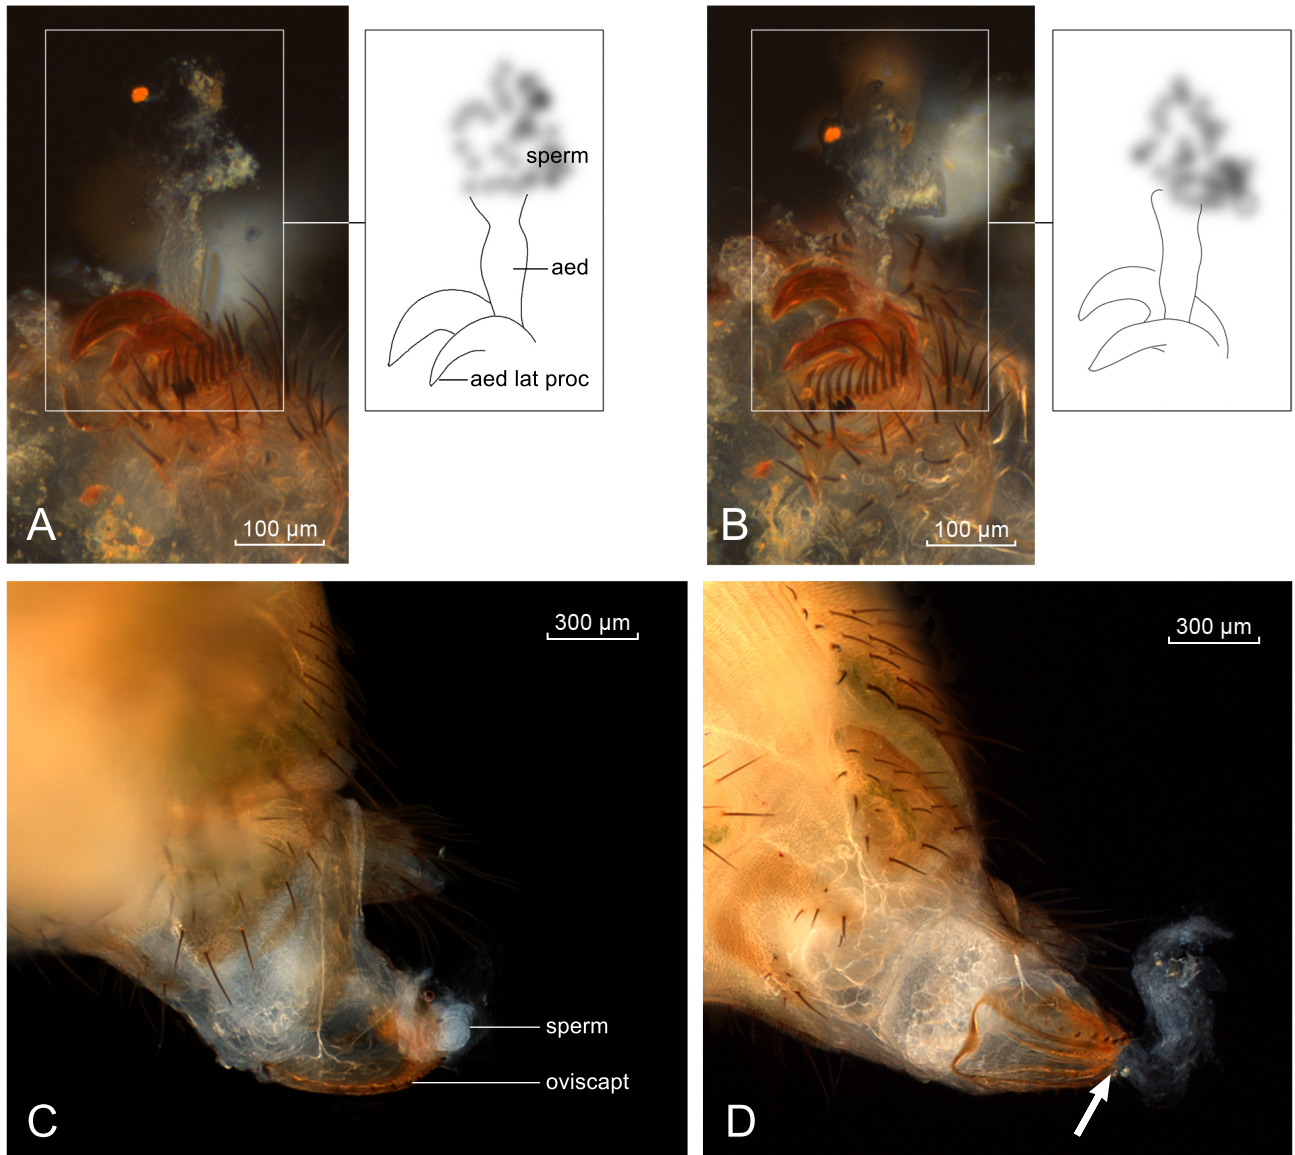

**Figure 5.** Light microscope images of the genitalia of a male-female pair *D. bipectinata* gently pulled apart during copulation and imaged, demonstrating the extruded aedeagus and female oviscape. **(A), (B)** The aedeagus of the male is clearly shown with sperm emanating from its tip; **(B)** the aedeagus arises from between the bases of the aedeagal lateral processes. **(C)** Sperm simultaneously seeping from the female gonopore, and **(D)** sperm teased and pulled further out from the gonopore (arrowed).



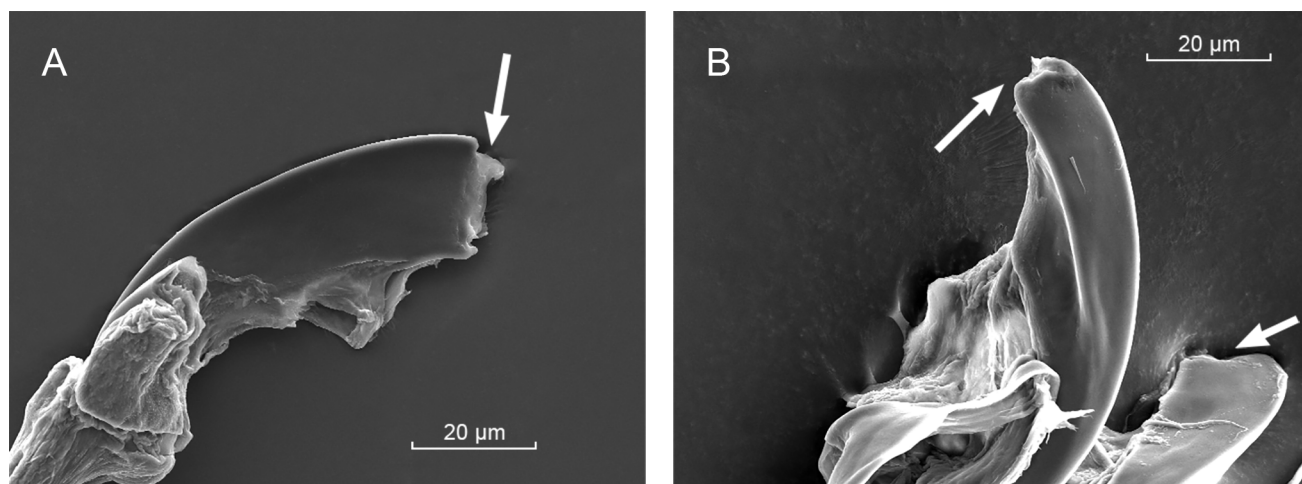

**Figure 6.** Scanning electron micrographs (1200 $\times$ ) of cut claws, or aedeagal lateral processes in *D. bipectinata*. Examples (A) and (B) of the processes experimentally blunted (arrowed) using ultra-precise laser surgery are shown. Both tip-ablated processes are visible in (B). From one third to one half of the distal ends of both aedeagal lateral processes of each male were ablated, completely eliminating their sharp terminal ends.

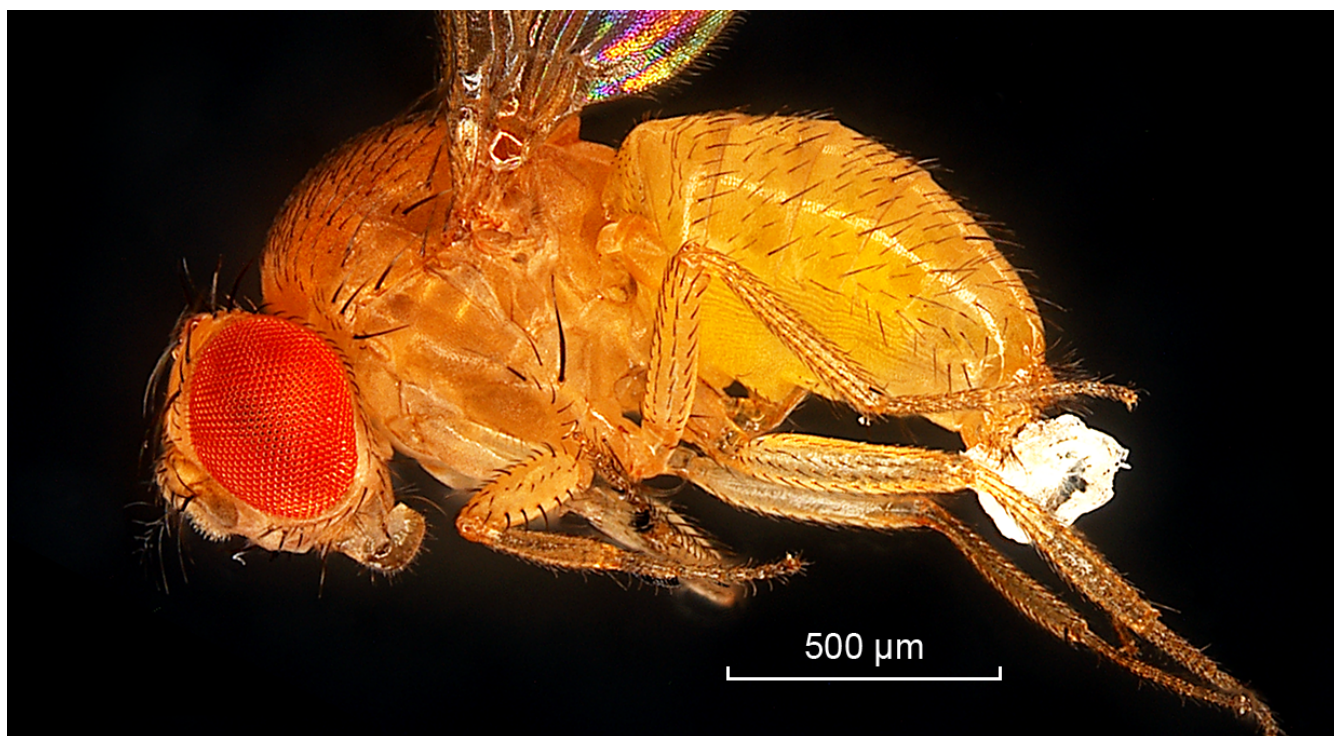

**Figure 7.** The ejaculate mass, adhered to the tip of a cut male's abdomen after copulation, had seeped out from between the pair during copulation. The tips of the aedeagal lateral processes in this *D. bipectinata* male had been ablated (Fig. 6) with a surgical laser prior to mating.
